# Supplementary material
Source: publisher figshare collection journal article supplement (https://geolsoc.figshare.com/ndownloader/files/14877023)
Supplement: Supplementary file 1 [file 14877023]

## Sheet: Sheet1
No.	Rock type	Analysis no.	Tourmaline type	11B/10B	δ11B (‰)	2σ (‰)a
1	Rhyolite porphyry	LTS6-2-1	Type I	4.49445	-12.9141	0.392
2		LTS6-2-2		4.49368	-13.0847	0.426
3		LTS6-2-3		4.49486	-12.8234	0.447
4		LTS6-2-4		4.49336	-13.1567	0.435
5		LTS6-2-5		4.49327	-13.1755	0.392
6		LTS6-4-1		4.39253	-14.1514	0.469
7		LTS6-4-2		4.43044	-13.3831	0.417
8		LTS6-4-3		4.4292	-13.0611	0.606
9		LTS6-4-4		4.42793	-13.3471	0.387
10		LTS6-4-5		4.42654	-13.6589	0.35
11		LTS6-5-1		4.4895	-12.6679	0.415
12		LTS6-5-2		4.49011	-12.1782	0.42
13		LTS6-5-3		4.49085	-12.0129	0.372
14		LTS6-5-5		4.4909	-12.0013	0.336
15		LTS6-7-1		4.47514	-14.4544	0.466
16		LTS6-7-2		4.47222	-14.3454	0.397
17		LTS6-7-3		4.47485	-14.1436	0.45
18		LTS6-7-4		4.47734	-13.9674	0.403
19		LTS6-7-5		4.48018	-12.9549	0.376
20		LTS6-7-6		4.48306	-12.3152	0.405
21	Au-bearing breccia	LTS5-1	Type II	4.47538	-13.7955	0.424
22		LTS5-2		4.47436	-12.523	0.441
23		LTS5-3		4.47387	-12.3046	0.441
24		LTS5-4		4.47299	-11.7321	0.434
25		LTS5-5		4.46996	-12.6292	0.429
26		LTS5-7		4.46032	-12.7881	0.527
27		LTS5-8		4.45782	-13.3443	0.336
28		LTS5-9		4.45901	-13.0788	0.284
29		LTS7-1		4.43408	-11.518	0.378
30		LTS7-2		4.43473	-11.3732	0.417
31		LTS7-3		4.43505	-11.3005	0.43
32		LTS7-4		4.43536	-11.2304	0.416
33		LTS7-5		4.42417	-11.6401	0.58
34		LTS7-7		4.3926	-11.5519	0.711
35		LTS7-8		4.39566	-10.8563	0.432
36		LTS7-9		4.40437	-11.3442	0.335
37		LTS7-10		4.40698	-10.7523	0.422
38	Granite porphyry	LTS10-1	Type III	4.42375	-11.7341	0.445
39		LTS10-2		4.42336	-11.8229	0.438
40		LTS10-3		4.42807	-11.0176	0.325
41		LTS10-5		4.52771	-13.8012	0.439
42		LTS10-6		4.53065	-13.154	0.412
43		LTS10-7		4.52841	-13.4061	0.351
44		LTS10-8		4.52874	-13.1527	0.656
45		LTS10-9		4.53095	-12.4877	0.444
46		LTS13-1		4.51222	-12.181	0.525
47		LTS13-2		4.51903	-10.677	0.56
48		LTS13-3		4.51095	-11.2435	0.457
49		LTS13-4		4.51583	-10.1645	0.296
50		LTS13-6		4.51109	-11.2126	0.472
51		LTS13-7		4.51335	-10.7128	0.424
52		LTS16-1		4.40482	-12.1077	0.502
53		LTS16-2		4.40535	-11.9622	0.513
54		LTS16-3		4.40822	-11.3137	0.446
55		LTS16-4		4.40902	-11.1332	0.424
56		LTS16-5		4.40787	-11.3918	0.332
57		LTS16-6		4.41309	-10.2118	0.434
58	Au-barren breccia	LTS8-3-1	Au-barren tur	4.53602	-12.4137	0.298
59		LTS8-3-2		4.5357	-12.4835	0.306
60		LTS8-3-3		4.53495	-12.5613	0.481
61		LTS8-3-4		4.53462	-12.6335	0.396
62		LTS8-3-6		4.53761	-11.9757	0.397
63		LTS8-3-7		4.5373	-12.044	0.312
64		LTS8-3-8		4.53636	-12.2496	0.337
65		LTS8-4-1		4.54023	-11.4017	0.215
66		LTS8-4-2		4.54283	-10.8304	0.445
67		LTS8-4-3		4.54507	-10.6696	0.431
68		LTS8-4-4		4.54246	-10.9987	0.269
69		LTS8-4-7		4.53802	-12.219	0.287
70		LTS8-4-8		4.53557	-12.7565	0.315
71		LTS8-4-9		4.53515	-12.6043	0.402
a Internal precision of 100 cycles (standard deviation/mean) × 1000
